1 **CD4+ T cell subsets present stable relationships in their T cell receptor repertoires**

2 Shiyu Wang<sup>1,2,3</sup>, Longlong Wang<sup>1,2,3</sup>, Ya Liu<sup>2,3,4</sup>

3

4 1. BGI Education Center, University of Chinese Academy of Sciences, Shenzhen 518083, China

5 2. BGI-Shenzhen, Shenzhen 518083, China

6 3. China National GeneBank, BGI-Shenzhen, Shenzhen 518120, China

7 4. Shenzhen Key Laboratory of Single-Cell Omics, BGI-Shenzhen, Shenzhen, 518100, China

8

9 Correspondence: liuyal@genomics.cn (Y. Liu)

10

11 **Abstract**

12 CD4<sup>+</sup> T cells are key components of adaptive immunity. The cell differentiation equips CD4<sup>+</sup>  
13 T cells with new functions. However, the effect of cell differentiation on T cell receptor (TCR)  
14 repertoire is not investigated. Here, we examined the features of TCR beta (TCRB) repertoire  
15 of the top clones within naïve, memory and regular T cell (Treg) subsets: repertoire structure,  
16 gene usage, length distribution and sequence composition. First, we found that memory subsets  
17 and Treg would be discriminated from naïve by the features of TCRB repertoire. Second, we  
18 found that the correlations between the features of memory subsets and naïve were positively  
19 related to differentiation levels of memory subsets. Third, we found that public clones presented  
20 a reduced proportion and a skewed sequence composition in differentiated subsets. Furthermore,  
21 we found that public clones led naïve to recognize a broader spectrum of antigens than other  
22 subsets. Our findings suggest that TCRB repertoire of CD4<sup>+</sup> T cell subsets is skewed in a  
23 differentiation-dependent manner. Our findings show that the variations of public clones  
24 contribute to these changes. Our findings indicate that the reduce of public clones in  
25 differentiation trim the antigen specificity of CD4<sup>+</sup> T cells. The study unveils the physiological  
26 effect of memory formation and facilitates the selection of proper CD4<sup>+</sup> subset for cellular  
27 therapy.

28 **Key words:** CD4<sup>+</sup> T cell, T cell receptor beta chain repertoire, differentiation, public clones

29

## 30 **Introduction**

31 CD4<sup>+</sup> T cells play critical roles in mediating adaptive immunity. Via T cell receptors  
32 (TCR), CD4<sup>+</sup> T cells recognize the complex of epitopes and major histocompatibility complex  
33 II and then induce the activation of other cells in infections<sup>1,2</sup>, cancer<sup>3</sup> and autoimmune diseases.

34 To acquire mature functions, CD4<sup>+</sup> T cells undergo differentiation. NT is the prototype of  
35 CD4<sup>+</sup> T cell and has the greatest potential among CD4<sup>+</sup> T subsets to differentiate to other  
36 subsets. NT usually keep a serenity and can refresh themselves by proliferation. When NT  
37 encounters pathogens, it will home to lymphatic organs and receive the help from dendritic  
38 cells to initiate the polarization. The study on TCR repertoire suggests that NT has the most  
39 large scale of evenness of TCR repertoire among all CD4<sup>+</sup> subsets<sup>4</sup>, which indicates the  
40 greatest potential to recognize antigens. In a classical differentiation model<sup>5,6</sup>, naive (NT)  
41 senses stimulations via TCR, polarizes and then differentiates to effector T (ET). ET plays the  
42 key role to mediate adaptive immune response, although the amount of ET in peripheral blood  
43 is limited. After few weeks' activation, a small part of ET differentiates to memory. Memory is  
44 sensitive to antigens, while always keeps silent. In peripheral blood, central memory (CMT),  
45 effector memory (EMT) and stem-cell like memory T cell (Tscm) are main subsets of memory.  
46 CMT and Tscm have a potential to be self-renewal and is found to affect the infections. EMT,  
47 compared to CMT<sup>7</sup>, is long-lived and has a lower threshold to reactivate to pathogens.  
48 Compared to NT, memory subsets have a lower diversity of TCRB repertoire<sup>8</sup>. However, it is  
49 unclear that large differences between NT and memory subsets exist in the functions of TCR  
50 repertoire or not. Treg is a special subset of CD4<sup>+</sup> cell and usually plays a role to regulate  
51 functions, proliferation, and differentiation of conventional T cells<sup>9</sup>.

52 TCR plays the key role to determine T cell functions<sup>10</sup>. For NT, signals via diverse TCRs  
53 reform the TCR repertoire, and skew their differentiation potential. For instance, strong TCR  
54 signals during viral infection correspond to helper T cell differentiation, and comparative lower  
55 signals facilitate the differentiation of memory and follicular T cell<sup>11</sup>. Memory's TCR repertoire  
56 composition determines the possibility to provide a rapid protection for individuals to against  
57 former and, sometimes, novel antigens. For example, the architecture of the TCR repertoire  
58 contributes to the performance of the adaptive immune response against pathogens, such as

59 SARS-CoV-2<sup>12</sup>. Cross-reactivation from memory can provide a rapid protection to a novel  
60 pathogen in some individuals, such as the case reports of COVID-19<sup>13</sup>. The importance of TCR  
61 repertoire for memory cell functions was found in tissues, where the differential composition  
62 of TCR repertoire of CD4<sup>+</sup> memory among tissues equipped them with distinct functions<sup>14</sup>.  
63 The function of Treg was restricted by TCR repertoire. The optimal diversity of TCR was  
64 essential for the suppressive ability<sup>15</sup>, and limitations on TCR diversity disturbed the self-  
65 tolerance of immune system<sup>16</sup>. Although evidences show that the features of TCR repertoire are  
66 distinct among CD4<sup>+</sup> T subsets, the effect of differentiation on T cell receptor (TCR) repertoire  
67 of CD4<sup>+</sup> T cells are not investigated.

68 To unveil the influence of differentiation on TCR repertoire, we analyzed the sequencing  
69 data of TCR beta (TCRB) chain of NT, ET, EMT, CMT, Tscm and Treg. We detected repertoire  
70 structure, germline gene usage, sequence composition and public clones of TCRB repertoire of  
71 each subset. We found that NT, CMT, Tscm and Treg were discriminated from each other by  
72 repertoire structure, gene usage and sequence composition, independently. The TCRB  
73 repertoires of NT are similar to the TCRB repertoires of less-differentiated memory subset (for  
74 example, Tscm and CMT). The TCRB repertoires of ET and the TCRB repertoires of EMT are  
75 sensitive to the healthy state and have flexible relationships with other subsets. Public clones  
76 account for the main part of top clones of NT and reduce along the CD4<sup>+</sup> cell differentiation.  
77 The enrichment of public clones shortens the length distribution of top clones in NT. Public  
78 clones are polyfunctional and broaden the antigen spectrum recognized by NT. Our findings  
79 disclose the differential functions of CD4<sup>+</sup> cell subsets and the influence of differentiation on  
80 TCR repertoire. Our findings facilitate the selection of CD4<sup>+</sup> subsets for cellular therapy.

81

## 82 **Material and Methods**

### 83 **Datasets**

84 In this study, we conducted analyses on high-throughput TCR repertoire datasets for  
85 CD4+ T cell subsets from publication described as follows.

86 Dataset1 included Naïve (NT), central memory (CMT), stem-cell like memory (Tscm)  
87 and Treg from eight healthy individuals and eight type-one-diabetes (T1D) patients<sup>17</sup>. CD4+  
88 T cells were sorted into subsets by fluorescence-activated cell sorting (FACS), and then RNA  
89 was extracted and sequenced in parallel. For validation, we employed dataset2 of five CD4+  
90 T cell subsets: NT, effector (ET), CMT, effector memory (EMT) and Treg from other ten  
91 rheumatoid arthritis patients (RA)<sup>18</sup>. Top1000 clones are referred as the 1000 clones with the  
92 highest frequency. The V-/J-segments used by top1000 clones were extracted for statistic.

### 93 **Statistical analysis and plots**

94 Statistical analyses were performed with R. Significance was examined by Willcox ranked  
95 test. The correlation coefficients and significance was tested using `cor.test()` in R with default  
96 parameters. Graphics were generated with R package `ggplot2`. Principle component analysis  
97 (PCA) was conducted with R package `forcats`. Data was treated with R package `readr`, `dplyr`  
98 and `tidyr`.

### 99 **Definition of a clone**

100 For all analyses, clones were defined as the amino acid sequence identity of CDR3 (TCRB)  
101 regions. CDR3s from dataset1 were defined and annotated by IMonitor<sup>19</sup>, and CDR3s from  
102 dataset2 were reported by authors.

### 103 **Determination of diversity**

104 Renyi entropy was used in our study to evaluate the diversity with alpha value from 0 to  
105 20. When alpha is 1, the index equals to the Shannon index. Renyi entropy formula is  $H =$   
106  $\frac{1}{1-q} \ln(\sum_{i=1}^R p_i^q)$ , and Shannon diversity index formula is  $H = -\sum_{i=1}^R p_i \ln p_i$ , where  $H$  is  
107 the diversity index,  $q$  is alpha value,  $R$  is the total number of clones for analysis, and  $p_i$  is the  
108 frequency of the  $i$ th clone.

109

## 110 **Determination of Jensen-Shannon distance**

111       Jensen-Shannon distance (JSD) is used to evaluate the similarity in repertoire architecture  
112 among subsets<sup>20</sup>. We calculated JSD with `JSD()`, a function included in `philentropy` (<sup>21</sup>), a R  
113 package. A low JSD indicates that TCRB repertoire structures are similar.

## 114 **Identify the contribution of k-mer to PCA classification**

115       We used `prcomp()` to calculate the principle components (PC) for data, and estimated the  
116 contribution of each k-mer to PC1 and PC2 with `cos2()`.

## 117 **KeBABS SVM analysis**

118       SVM analysis was performed using kernel-based analysis of biological sequences with a  
119 R package `KeBABS`<sup>22</sup>. Amino acid sequence of clones was split into features with length  $k =$   
120 3, and cost parameter  $C = 100$  was used for the misclassification of a sequence. For all SVM  
121 analyses, data was split into training (80%) and test (20%) set. SVM training was performed on  
122 the training set, and class prediction was performed on the test set. Prediction accuracy of  
123 classification was qualified by calculating  $BACC = \frac{1}{2} \times (spec + sens)$ , where specificity was  
124 calculated as  $spec = \frac{TN}{TN + FP}$ , and sensitivity was defined as  $sens = \frac{TP}{TP + FN}$ , (where TN =  
125 true negative, FP = false negative, TP = true positive and FN = false negative). The area under  
126 the receiver operating characteristic curve (AUC) was calculated, where the AUC = 0.5 means  
127 a random classification (BACC = 50%), and AUC = 1 means a perfect classification (BACC =  
128 100%).

## 129 **Determination of epitope specificity of clones by GLIPH2**

130       GLIPH2<sup>23</sup> is a robust tool to predict the cluster of clones targeting the same epitope. Here, we  
131 use this method to unveil the diversity of potential epitopes targeted by top1000 clones in each  
132 subset. The reference of CD4+ T clones and their gene usage, the distribution of gene usage of  
133 CD4+ T and length distribution of CDR3 were included in `ref_CD4.txt`, `ref_V_CD4.txt` and  
134 `ref_L_CD4.txt`. These reference files were downloaded from the official website of GLIPH2  
135 (<http://50.255.35.37:8080/>). A filter with a high stringency (`Fisher_score < 0.0001`,  
136 `number_subject >= 3` and `number_unique_cdr3 >= 3`) was used to improve the prediction  
137 accuracy.

138 **Results**

139 **The TCRB repertoire structure of NT is similar to The TCRB repertoire structure of CMT**  
140 **and Tscm**

141 Frequent clones affect the immune repertoire structure<sup>24</sup>. We thus performed the analyses  
142 on top1000 clones within each subset. Renyi entropy with alpha values from zero to twenty was  
143 used to evaluate the diversity. In dataset1, The TCRB repertoire of NT and Tscm present similar  
144 diversities at all alpha values, and are more diverse than the TCRB repertoire of CMT and the  
145 TCRB repertoire of Treg (Figure 1A). In dataset2, NT has the most diverse TCRB repertoire  
146 among all subset whereas ET has the lowest. The TCRB repertoire of CMT is more diverse  
147 than that of ETM and Treg. (Supplementary figure 1A). The similarity of TCRB repertoire  
148 structure of subsets was estimated by Jensen-Shannon distance. In dataset1, the TCRB  
149 repertoire structure of NT is similar to the TCRB repertoire structure of less-differentiated  
150 subsets (CMT and Tscm), but the TCR repertoire structures of Tscm and CMT are different  
151 from each other; the TCRB repertoire of Treg is different to the TCRB repertoire of NT and  
152 CMT with high JSDs. It indicates that Treg has a structure of TCRB repertoire like that of more-  
153 differentiated memory subsets (Figure 1B). In dataset2, NT and CMT have similar TCRB  
154 repertoire structures, and the TCRB repertoire structure of Treg is similar to the TCRB  
155 repertoire structure of EMT rather than that of CMT (Supplemental Figure 1B). These findings  
156 fit with the trend found in dataset1. To consider the overlapping usage of CDR3 clones, we  
157 further evaluated the similarity of TCRB repertoire among subsets with the Morisita-Horn  
158 similarity index. In this analysis, NT keeps a similar TCRB repertoire like Tscm and CMT,  
159 while the TCRB repertoire of NT is different from the TCRB repertoire of EMT and Treg  
160 (Figure 1C; Supplemental Figure 1C). In conclusion, the TCRB repertoire structure of CD4+ T  
161 cells is skewed along with cell differentiation levels.

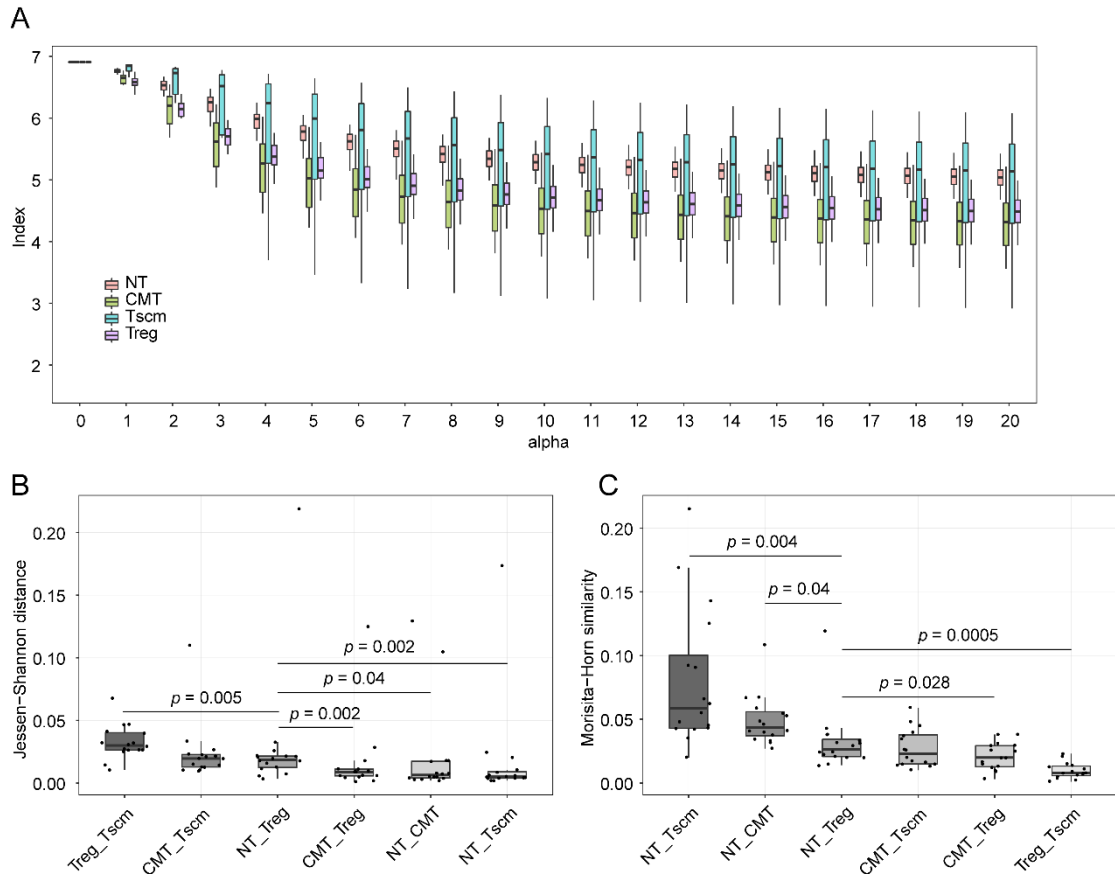

162

163 **Figure 1. The diversity of TCRB repertoire of four subsets and the relationship of their**  
164 **TCRB repertoire structures. (A)** The Renyi entropy index of all subsets with alpha value from  
165 0 to 20. When alpha is equal to 1, the index was calculated as Shannon-index. **(B)** The Jessen-  
166 Shannon distance between subsets. The difference between NT and other subsets, and Treg and  
167 other subsets were tested. **(C)** The Morisita-Horn similarity between subsets. Paired Wilcox-  
168 ranked test was used in **B** and **C**.

169 **Gene usage is distinct among subsets and a part of genes are skewed along subsets**

170 We used principle component analysis (PCA) to examine the discrimination of gene usage  
171 among subsets. NT, CMT, Tscm and Treg could be distinguished from each other by V- and J-  
172 gene respectively (Figure 2A and B; Supplemental Figure 2A). However, EMT and ET could  
173 not be separated from other subsets in dataset2 (Supplemental Figure 2A). We examined the  
174 genes usage of each subset, and found that 24 of 72 genes were differently used by NT, Tscm  
175 and CMT in dataset1, 23 of 72 genes were differently used by NT and CMT in dataset2. There  
176 are 11 increased genes and 13 decreased genes in CMT, compared with NT in dataset1; and 3



177 increased genes and 20 decreased genes in dataset2, compared with NT in dataset2. Notably,  
 178 these genes continuously changed according to NT, CMT, ET, EMT and Treg (Supplemental  
 179 Figure 2C and D).

180 With the correlations of V-gene usage among subsets, we found that NT, CMT and Tscm  
 181 show high correlations with each other, while their correlations with Treg are low (Figure 2E;  
 182 Supplementary Figure 2E). For J-gene, NT also shows a high correlation with CMT and Tscm,  
 183 whereas a low correlation with Treg. In dataset2, the V-gene usage of NT highly correlates to  
 184 the V-gene usage of CMT rather than EMT and Treg (Supplementary Figure 2F). Notably, the  
 185 V-gene usage of Treg is similar to the V-gene usage of NT rather than to the V-gene usage of  
 186 CMT in the T1D donors ( $p=0.0005$ , Supplementary Figure 4) but not in health donors ( $p=0.05$ ).  
 187 This phenomenon suggests Treg has a flexible relationship with NT depending on the healthy  
 188 states of donors. In conclusion, NT, memory subsets and Treg have distinct gene usages, and  
 189 the gene usage of NT is more similar to less-differentiated memory subsets (CMT and Tscm)  
 190 rather than EMT.

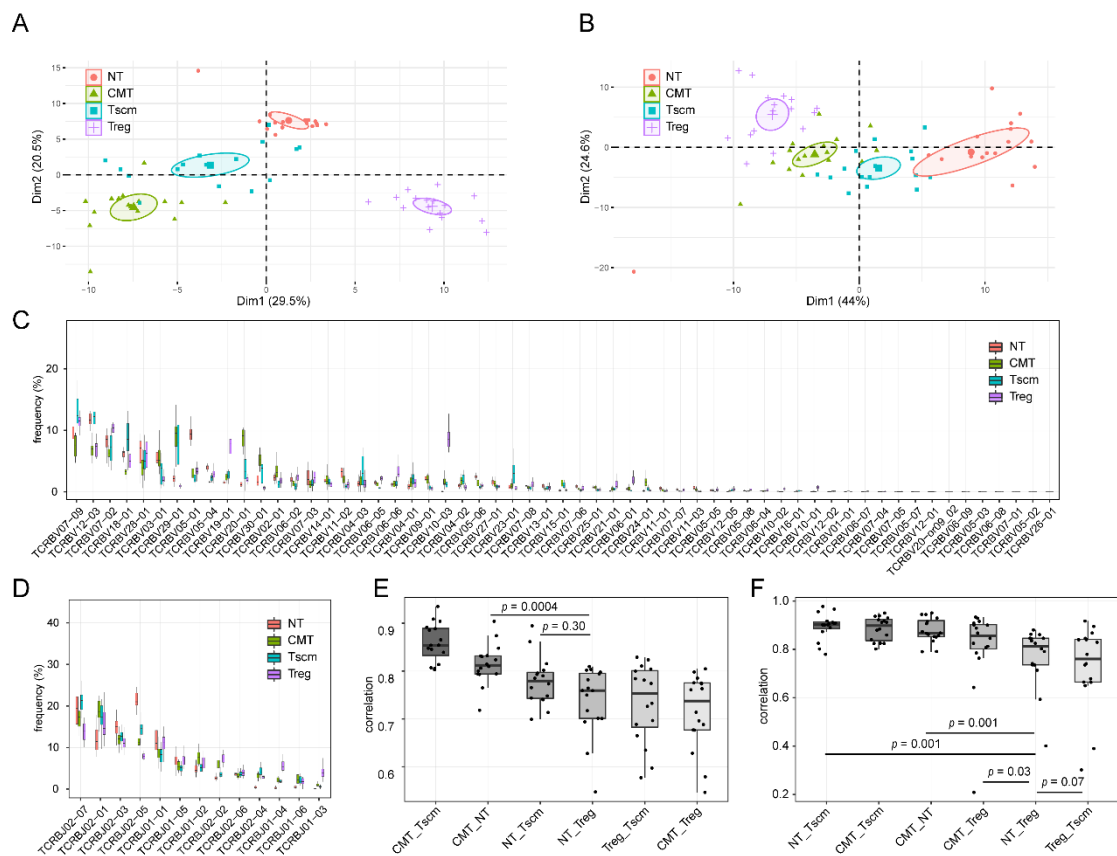

191

192 **Figure 2. The V- and J-gene usage of CD4+ T subsets and the relationships of the gene**

193 **usage of subsets.** (A) PCA for the frequency of V-genes of each subset. (B) PCA for the  
194 frequency of J-genes of each subset. (C) The frequency of V-genes of each subset. (D) the  
195 frequency of J-gene within each subset. (E) The Spearman correlation of V-gene usage between  
196 subsets. (F) The Spearman correlation of J-gene usage between subsets. Paired Wilcox-ranked  
197 test was used in E and F.

198 **CDR3 sequence composition are different among TCRB repertoire of subsets and indels**  
199 **contribute to these differences highly**

200 We examined the CDR3 sequence composition by decomposing kernels containing three  
201 amino acids. To identify the difference in the composition among subsets, we used PCA to  
202 discriminate subsets. In PCA plot, subsets are distinguished from each other. Treg is close to  
203 EMT, CMT mix with ET. NT has a clear boundary to others (Figure 3A; Supplemental Figure  
204 5A). To evaluate the correlation of k-mer among subsets, we used Spearman correlation method.  
205 The k-mer usage of NT exhibits weakened correlations with others according to Tscm, CMT  
206 and Treg in dataset1, and CMT, ET, EMT and Treg in dataset2 (Figure 3B; Supplemental Figure  
207 5B).

208 To identify the subregions where the k-mers contributes to PCA, we extracted the top100  
209 k-mers by ranking their contributions to principle component 1 (PC1) and principle component  
210 2 (PC2). 6371 unique k-mers were used by both of PC1 and PC2. We ranked k-mers by their  
211 contributions to PC1 and PC2 respectively, and found that PC1 and PC2 shared 63 top100 k-  
212 mers (Figure 3C; Supplemental Figure 5C). Then we aligned k-mer to references, and showed  
213 that 29 top100 k-mers located in V-region and 47 in J-region. However, after we removed the  
214 k-mer enriching in V-/J-segments, we found that NT, Tscm, CMT and Treg still kept distinctions  
215 to each other (Figure 3D). we further perform a same operation on dataset2 to remove the k-  
216 mer in V- and J-segments, and showed a similar result that NT, CMT and Treg are able to be  
217 distinguished from each other (Supplemental Figure 5D). Since the gene usage, insertion and  
218 deletion (indel) are factors to skew the CDR3 sequence compositions<sup>25</sup>, these results suggests  
219 that indel in N1-D-N2 region rather than gene usage contribute to the difference of sequence  
220 composition among subsets.

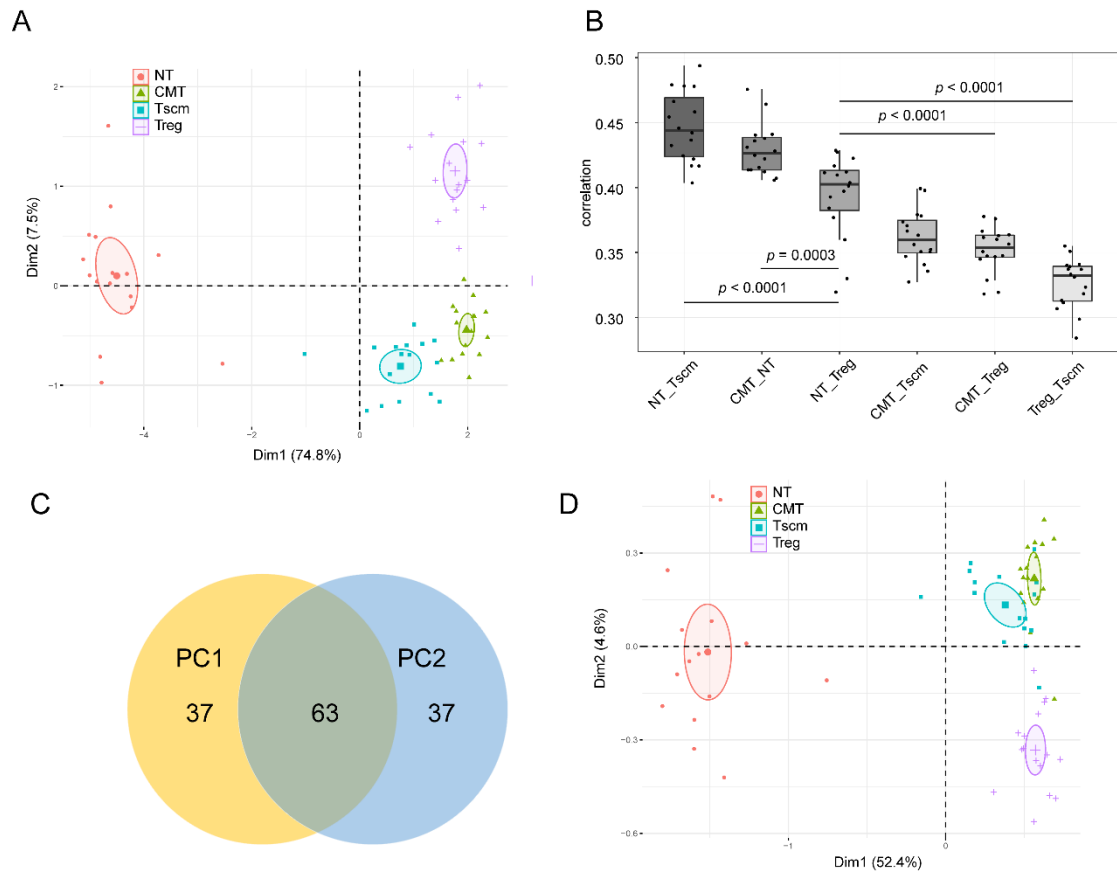

221

222 **Figure 3. The relationship of sequence composition among subsets.** (A) PCA based on the  
 223 sequence composition for samples. (B) Spearman correlations of k-mer usage between subsets.  
 224 (C) The overlap of top100 k-mers which mostly contribute to principle component 1 (PC1) and  
 225 PC2. (D) the PCA based on sequence composition without those located on V- and J-segments  
 226 for samples. Paired Wilcox-ranked test was used in B.

227 **Top1000 clones within NT are shorter than those in other subsets and the shortness is little**  
 228 **affected by V-/J-gene usage**

229 The entire repertoire of NT was reported to be longer than the repertoire of memory<sup>26</sup>.  
 230 However, we found that the top clones in NT were shorter than clones in other subsets in all  
 231 datasets (Figure 4A; Supplemental Figure 6). Via calculation of the Pearson correlations, the  
 232 length distribution of NT is different to the length distribution of CMT and Tscm. It suggests  
 233 that the length distribution of TCRB repertoire of NT is highly skewed in these less-  
 234 differentiated memory cells (Figure 4B). Since the naïve cells are sorted without antibody  
 235 against CD27 in dataset2, the length distribution of NT can be affected by the contamination  
 236 from cell sorting. We examined the length distribution in dataset 1.

237 To identify whether the gene usage affects the CDR3 length distribution, we calculated the  
 238 mean length of clones for each gene. The mean length is different among clones by varied V-  
 239 and J-genes (Figure 4C and D), however, clones using all of genes are shorter in NT than -  
 240 clones in CMT and Tscm. Therefore, for top clones, the clones of NT are shorter than the clones  
 241 of other subsets, and the gene usage contributes less to the distinct length distributions among  
 242 subsets.

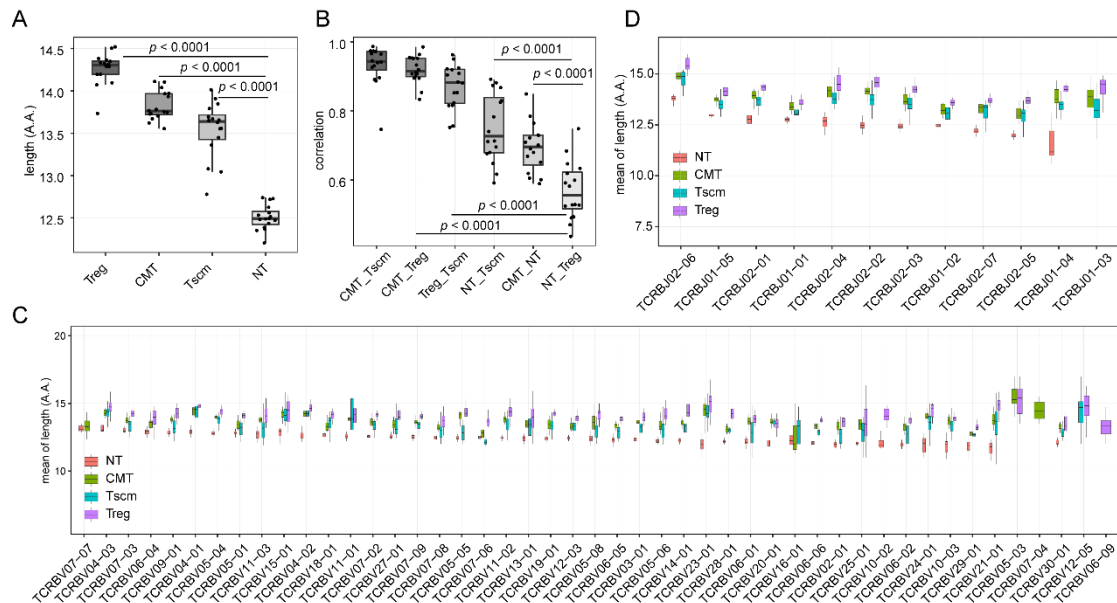

243

244 **Figure 4. The correlations of length distribution among subsets and the influence of gene**  
 245 **usage on length distribution.** (A) The length distribution of CDR3s of each subset. (B) The  
 246 correlation of length distribution between subsets. (C) The mean length of clones using each V-  
 247 gene. (D) The mean length of clones using each J-gene. Paired Wilcox-ranked test was used in  
 248 A and B.

249 **Public clones enrich in NT and have more differences with private clones in memory**  
 250 **subsets than in NT**

251 Public clones that are shared by individuals were shown to be different from private clones  
 252 in sequence composition<sup>25</sup>. Our analyses showed that public clones were shorter than private  
 253 ones within top1000 clones (Supplemental Figure 7A). It suggests that public clones may affect  
 254 the features of top clones. We referred clones found in no less than two individuals as public  
 255 clones. We found more public clones in NT than in other subsets: 1,400 in NT, 262 in Tscm,  
 256 113 in CMT, and 72 in Treg from HD; 1544 in NT, 146 in Tscm, 128 in CMT and 92 in Treg

257 from T1D (Figure 5A; Supplemental Figure 7B). Via calculating abundance, we found that  
 258 public clones were composed of ~70% of top1000 in NT, and ~5% in other subsets. It suggests  
 259 that the public clones in NT have a larger effect on the repertoire of top clones than the public  
 260 clones in others (Figure 5B). Most of public clones in NT were a little presented in other subsets  
 261 (Figure 5C), and about 50% public clones in each subset could be found in NT. This result  
 262 indicates that public clones in NT are less maintained than the top clones in other subsets. To  
 263 detect the differences between public clones and private clones within each subset, support  
 264 vector machine (SVM) was used. To avoid the influence of differential sample sizes, we  
 265 randomly down-sampled 400 public clones and private clones for each subset, respectively. The  
 266 prediction was repeated for 100 times. The prediction accuracy (BACC) in NT was found to be  
 267 lower than BACC in other subsets (Figure 5D). It suggests that the differences between private  
 268 and public clones in differentiated subsets are larger than the differences in naïve. Further  
 269 analyses showed that the gene usage of public clones is similar to the gene usage of all top1000  
 270 clones (Supplemental Figure 7C). It suggests that gene usage is not skewed in public clones.

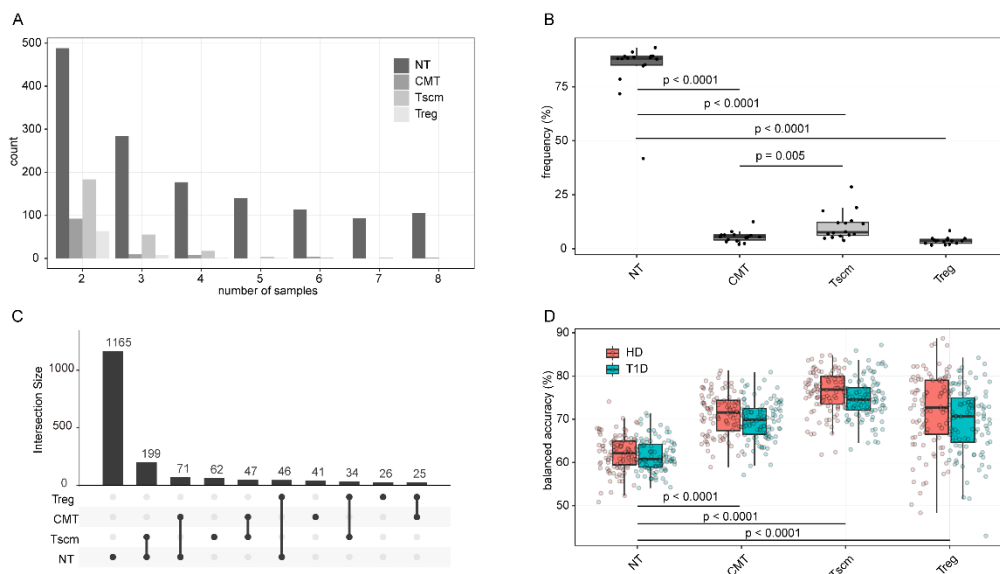

271

272 **Figure 5. The differential usage of public clones among subsets and the discrimination of**  
 273 **sequence composition between public clones and private clones. (A)** The number of public  
 274 clones shared by from two to eight HDs. **(B)** The percentage of unique public clones within top  
 275 clones in each subset. **(C)** The overlap of public clones from HDs among subsets. **(D)** The  
 276 prediction accuracy (BACC) of SVM ( $k = 3$ ) for public clones and private clones based on

277 sequence composition within each subset. Paired Wilcoxon-ranked test was used in **B**, Wilcoxon-  
278 ranked test was used in **D**.

### 279 **The sequence compositions of public clones and private clones are both skewed along** 280 **differentiation**

281 To identify that public clones or private clones account for the increased difference in  
282 memory and Treg, we performed SVM to discriminate public clones as well as private clones  
283 from different subsets separately<sup>25</sup>. For public clones, the BACC was from 50% to 60%; NT  
284 was able to be discriminated from Treg, CMT and Tscm with ~ 55% BACC; whereas CMT was  
285 incapable of separating from Tscm with ~ 50% BACC (Figure 6A). For private clones, the  
286 BACC was from 50% to 70%. We were able to achieve a high prediction accuracy to  
287 discriminate private clones of TN from private clones of Treg, but we failed to separate private  
288 clones from CMT and Tscm (Figure 6B). When we increased the sample size of private clones  
289 from 400 to 2500 for training SVM model, we found that the varied BACCs to discriminate  
290 private clones from different subsets were still existed (Supplemental Figure 8A). These results  
291 suggest that the sequence compositions of public clones and private clones are both skewed in  
292 differentiation.

### 293 **The reduced number of public clones narrows the antigen spectrum recognized by** 294 **differentiated subsets**

295 To unveil the functions of clones among subsets, we annotated clones by VDJDdb<sup>27</sup>. 1885  
296 clones of CD4<sup>+</sup> T cells targeting eight epitopes in total are recorded by this database.  
297 Comparing with CMT, Tscm and Treg, NT has more clones recognizing antigens (HA, H1 and  
298 NP) from influenza, pp65 from cytomegalovirus (CMV), CFP10 from *M. tuberculosis* and  
299 gliadin from *Triticum Aestivum* (Figure 6C; Supplementary figure 8B). To estimate the  
300 spectrum of antigens targeted by the top clones, we used GLIPH2<sup>23</sup> to predict the clusters  
301 recognizing diverse antigens for each subset. With a stringency filter (see Methods), we found  
302 out 806 clusters in NT from HC and 836 clusters in NT from T1D respectively; while less than  
303 200 clusters in whole of Tscm, CMT and Treg (Figure 6D). When public clones were removed  
304 from top clones, only 14.88% clusters remained in NT of HC and 13.25% clusters remained in  
305 T1D, whereas over 45% clusters remained in other subsets (Figure 6E). It suggests that the

306 public clones enlarge the antigen spectrum recognized by top clones in NT. In conclusion, NT  
307 recognizes a broader antigen profile contributed by public clones.

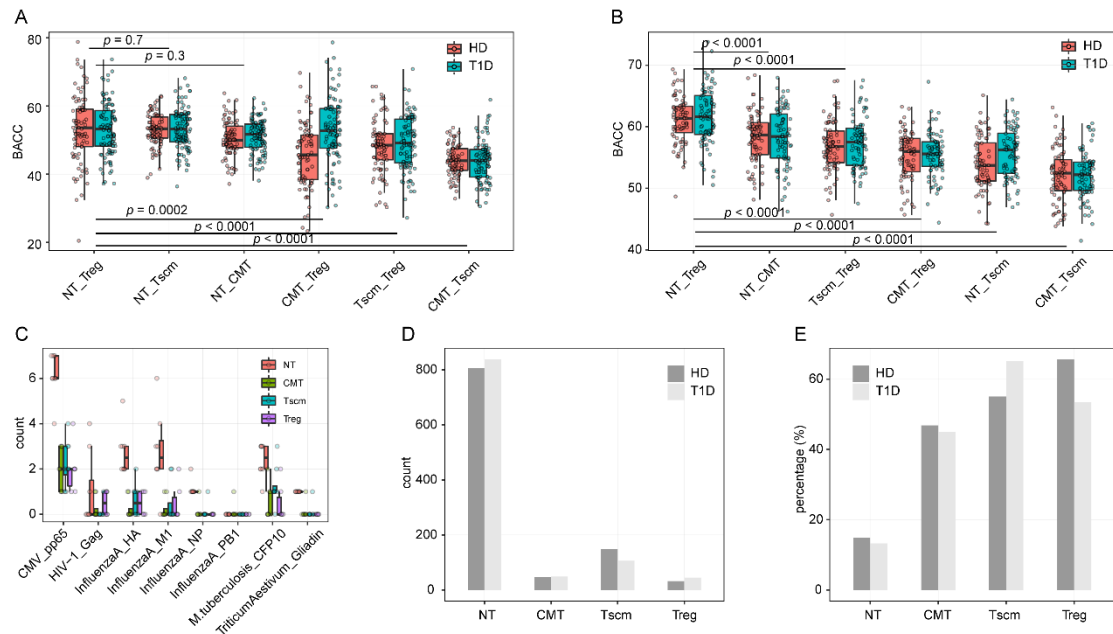

308

309 **Figure 6. public clones maintain stable composition across subsets and provide the large**  
310 **part of the ability to recognize antigens. (A) SVM for discriminating the composition of**  
311 **public clones among subsets. (B) SVM for discriminating the composition of private clones**  
312 **among subsets. (C) The enrichment of antigen-related clones in each subset. (D) the number of**  
313 **clusters targeting diverse antigens predicted by GLIPH2 within each subset. (E) The percentage**  
314 **of clusters of private clones predicted by GLIPH2 within each subset. Wilcox-ranked test was**  
315 **used in A and B.**

316

317 **Discussion**

318 It is essential for CD4+ T cells to recognize antigens with TCR, which is primarily  
319 achieved by the CDR3 region. CD4+ T cells can acquire new functions via differentiation;  
320 however, it is unclear how differentiation affects their TCR repertoire. We detected the  
321 relationships among the TCRB repertoire of top1000 clones of naïve, memory and Treg subsets  
322 (including NT, ET, Tcm, Tem, Tscm ET and Treg) by estimating the repertoire structure, the  
323 germline gene usage, the sequence composition (K-mer) and public CDR3 clone usage.

324 We derive that the TRBV repertoire features of memory subsets are tightly regulated in  
325 differentiation. We observed that 23 of 72 genes increased or decreased in an order of NT, Tscm,  
326 CMT and EMT. It indicates that a mechanism exists to regulate the variations across subsets.  
327 Furthermore, since Tscm is the least differentiated cell whereas EMT is the highest one among  
328 the tree memory subsets<sup>28</sup>, it indicates that the differentiation level is along with the mechanism.  
329 CMT is formally considered as the primary memory subset which ET prefer to differentiate to,  
330 and then part of CMT differentiates to EMT. In the past decade, Tscm has been found to mix  
331 phenotypes of naïve and memory. Tscm is able to self-renew and replenish more differentiated  
332 subsets of memory T cells, and therefore acts as the key intermediary of the generation of  
333 memory<sup>29,30</sup>. In together, differentiation levels of memory subsets reflect their differentiation  
334 order. However, memory cells can be directly generated from naïve cells by asymmetric cell  
335 division<sup>31,32</sup>. It indicates that the differential order should not be the only factor skewing TCRB  
336 repertoire. Shown by X. L. Hou *et al*<sup>33</sup>, the early events in thymic T cell development are  
337 different for CD4+ naïve and memory cells. It suggests that genetic factors affect TCRB  
338 repertoire of CD4+ T cells in differentiation. In addition, events at the very early lifetime can  
339 be involved in manipulating TCRB repertoire. Observations in newborns show that memory in  
340 human develops at the very early period of lifetime<sup>34</sup>. Newborns less encounter pathogenic  
341 antigens. It implies that, for newborns, food, self-antigens and even cytokine driven clones  
342 compose the large part of TCRB repertoire of memory. Since the highly frequent clones in NT  
343 are self-antigen related, the features of frequent clones in NT will be delivered to memory at  
344 this period<sup>35</sup>. Furthermore, shown by Graeme *et al*, a half part of memory is maintained by self-  
345 renewal influx during the lifetime<sup>36</sup>. S. Jaafoura *et al* showed that less-differentiated memory  
346 subset is more stable during pathogen infection<sup>28</sup>. It suggests that Tscm and CMT rather than



347 EMT maintain the features of TCRB repertoire inherited from NT at the early lifetime. In  
348 conclusion, it is reasonable to drive that events at the early lifetime, genetic factors and  
349 differentiation order regulate the TCRB repertoire of CD4+ T subsets with differentiated levels.

350 Public clones are key components that affect the features of TCRB repertoire in  
351 differentiation. First, we found that public clone usage rather than gene usage shortens the  
352 length distribution of top clones within NT. Second, the sequence composition of public clones  
353 which is skewed in differentiated subsets contribute to the variations of TCRB repertoire in  
354 differentiation. Third, decreased public clones induce a reduction in antigen spectrum  
355 recognized by memory and Treg subsets. These results suggest that the skewed public clone  
356 usage highly affect top clones in differentiated subsets. Furthermore, we showed that factors  
357 affecting the generation of public clones in memory and Treg are different to that in NT. The  
358 generation of public clones were largely attributed to genetic factors and thymic positive  
359 selection in the previous study<sup>37</sup>. In our study, public clones from NT are less maintained in  
360 differentiated subsets, and SVM analyses indicate that sequence composition in memory  
361 subsets is different from that of NT. These results suggest that other factors, such as antigen,  
362 trim the sequence composition of public clones. However, there are uncertainties about public  
363 clones in NT. First, it is unclear to the cause that the promiscuous ability of public clones does  
364 not induce the clonality of the public clones in effector and memory subsets. Second, it is  
365 unclear that the physiological function of public clones in NT. As a hypothesis, the promiscuous  
366 public clones in NT, sensitive to many antigens, are important to initiate the primary immune  
367 response, and this function is forbidden in differentiated subsets. Further studies with single-  
368 cell RNA-seq and paired sequencing of TCR alpha and beta chains will unveil the biological  
369 functions of the public clones in NT.

370 In addition to the sample size, we identified that the T cell subset also affect the SVM  
371 prediction accuracy. Shown by Victor Grief *et al*<sup>25</sup>, public clones and private clones can be  
372 discriminated by SVM using k-mer distribution. SVM can obtain a better prediction accuracy  
373 (BACC) by using a larger sample size. We extended the detection in NT, Tscm, CMT and Treg.  
374 By normalizing the sample size for training, we found that the prediction accuracy for public  
375 clones and private clones in Tscm, CMT and Treg is higher than the prediction accuracy in NT.

376 It suggests that the difference between public clones and private clones is enlarged in the  
377 differentiated subsets. When we performed SVM on public clones and private clones among  
378 subsets respectively, the sequence compositions of public clones and private clones were  
379 skewed in differentiation.

380 A small part of peripheral Treg differentiated from conventional Treg. Shown by Golding  
381 *A. et al*, the repertoire of Foxp3+ and Foxp3- cells did not overlap<sup>38</sup>. Although peripheral Tregs  
382 are differentiated from conventional T cells<sup>39</sup> and can introduce the features of NT into Treg,  
383 the TCR repertoire of effector and memory subsets is similar to NT than to Treg. This  
384 phenomenon suggests that the influx from naïve just composed a minor part of Treg in blood,  
385 and comparing to Treg, the features of naïve are maintained in effector and memory subsets in  
386 the differentiation. Our study includes samples of three healthy states (healthy, RA and T1D  
387 individuals), and therefore highlights that our findings are consistent in healthy conditions and  
388 datasets.

### 389 **Acknowledgments**

390 The authors would like to thank Z.Q. Ding from Singapore institute of technology for edition  
391 of the manuscript; Y. Liu from BGI-Shenzhen and W. Zhang from department of computer  
392 science, City University of Hong Kong for comments on this manuscript.

### 393 **Conflicts of interest**

394 The authors declare no conflicts of interest.

### 395 **Author contributions**

396 SY. W. designed the study, performed the analyses, and drafted the manuscript; Y. L. supervised  
397 the study, and revised the manuscript.

### 398 **Financial support**

399 This work was supported by BGI-Shenzhen, China National GeneBank (CNGB), Science,  
400 Technology and Innovation Commission of Shenzhen Municipality under grant No.  
401 JCYJ20170817145845968, and Shenzhen Key Laboratory of Single-Cell Omics (NO.  
402 ZDSYS20190902093613831).

403

404 **References**

- 405 1 Wang, H. *et al.* TNF-alpha/IFN-gamma profile of HBV-specific CD4 T cells is associated  
406 with liver damage and viral clearance in chronic HBV infection. *J Hepatol* **72**, 45-56,  
407 doi:10.1016/j.jhep.2019.08.024 (2020).
- 408 2 Gray, J. I., Westerhof, L. M. & MacLeod, M. K. L. The roles of resident, central and effector  
409 memory CD4 T-cells in protective immunity following infection or vaccination.  
410 *Immunology*, doi:10.1111/imm.12929 (2018).
- 411 3 Zander, R. *et al.* CD4(+) T Cell Help Is Required for the Formation of a Cytolytic CD8(+) T  
412 Cell Subset that Protects against Chronic Infection and Cancer. *Immunity* **51**, 1028-1042  
413 e1024, doi:10.1016/j.immuni.2019.10.009 (2019).
- 414 4 de Greef, P. C. *et al.* The naive T-cell receptor repertoire has an extremely broad  
415 distribution of clone sizes. *Elife* **9**, doi:10.7554/eLife.49900 (2020).
- 416 5 Mueller, S. N., Gebhardt, T., Carbone, F. R. & Heath, W. R. Memory T cell subsets, migration  
417 patterns, and tissue residence. *Annu Rev Immunol* **31**, 137-161, doi:10.1146/annurev-  
418 immunol-032712-095954 (2013).
- 419 6 Kaech, S. M., Wherry, E. J. & Ahmed, R. Effector and memory T-cell differentiation:  
420 implications for vaccine development. *Nat Rev Immunol* **2**, 251-262, doi:10.1038/nri778  
421 (2002).
- 422 7 Jaigirdar, S. A. & MacLeod, M. K. Development and Function of Protective and Pathologic  
423 Memory CD4 T Cells. *Front Immunol* **6**, 456, doi:10.3389/fimmu.2015.00456 (2015).
- 424 8 Qi, Q. *et al.* Diversity and clonal selection in the human T-cell repertoire. *Proc Natl Acad*  
425 *Sci U S A* **111**, 13139-13144, doi:10.1073/pnas.1409155111 (2014).
- 426 9 Dowling, M. R. *et al.* Regulatory T Cells Suppress Effector T Cell Proliferation by Limiting  
427 Division Destiny. *Front Immunol* **9**, 2461, doi:10.3389/fimmu.2018.02461 (2018).
- 428 10 Li, M. O. & Rudensky, A. Y. T cell receptor signalling in the control of regulatory T cell  
429 differentiation and function. *Nat Rev Immunol* **16**, 220-233, doi:10.1038/nri.2016.26  
430 (2016).
- 431 11 Snook, J. P., Kim, C. & Williams, M. A. TCR signal strength controls the differentiation of  
432 CD4(+) effector and memory T cells. *Science immunology* **3**,  
433 doi:10.1126/sciimmunol.aas9103 (2018).
- 434 12 Gutierrez, L., Beckford, J. & Alachkar, H. Deciphering the TCR Repertoire to Solve the  
435 COVID-19 Mystery. *Trends Pharmacol Sci* **41**, 518-530, doi:10.1016/j.tips.2020.06.001  
436 (2020).
- 437 13 Grifoni, A. *et al.* Targets of T Cell Responses to SARS-CoV-2 Coronavirus in Humans with  
438 COVID-19 Disease and Unexposed Individuals. *Cell* **181**, 1489-1501 e1415,  
439 doi:10.1016/j.cell.2020.05.015 (2020).
- 440 14 Schoettler, N., Hrusch, C. L., Blaine, K. M., Sperling, A. I. & Ober, C. Transcriptional  
441 programming and T cell receptor repertoires distinguish human lung and lymph node  
442 memory T cells. *Commun Biol* **2**, 411, doi:10.1038/s42003-019-0657-2 (2019).
- 443 15 Fohse, L. *et al.* High TCR diversity ensures optimal function and homeostasis of Foxp3+  
444 regulatory T cells. *Eur J Immunol* **41**, 3101-3113, doi:10.1002/eji.201141986 (2011).
- 445 16 Adeegbe, D., Matsutani, T., Yang, J., Altman, N. H. & Malek, T. R. CD4(+) CD25(+) Foxp3(+)  
446 T regulatory cells with limited TCR diversity in control of autoimmunity. *J Immunol* **184**,  
447 56-66, doi:10.4049/jimmunol.0902379 (2010).

- 448 17 Gomez-Tourino, I., Kamra, Y., Baptista, R., Lorenc, A. & Peakman, M. T cell receptor beta-  
449 chains display abnormal shortening and repertoire sharing in type 1 diabetes. *Nat*  
450 *Commun* **8**, 1792, doi:10.1038/s41467-017-01925-2 (2017).
- 451 18 Jiang, X. *et al.* Comprehensive TCR repertoire analysis of CD4(+) T-cell subsets in  
452 rheumatoid arthritis. *J Autoimmun*, 102432, doi:10.1016/j.jaut.2020.102432 (2020).
- 453 19 Zhang, W. *et al.* IMonitor: A Robust Pipeline for TCR and BCR Repertoire Analysis. *Genetics*  
454 **201**, 459-472, doi:10.1534/genetics.115.176735 (2015).
- 455 20 Koch, H., Starenki, D., Cooper, S. J., Myers, R. M. & Li, Q. powerTCR: A model-based  
456 approach to comparative analysis of the clone size distribution of the T cell receptor  
457 repertoire. *PLoS Comput Biol* **14**, e1006571, doi:10.1371/journal.pcbi.1006571 (2018).
- 458 21 Drost, H.-G. Philentropy: Information Theory and Distance Quantification with R. *Journal*  
459 *of Open Source Software* **3**, doi:10.21105/joss.00765 (2018).
- 460 22 Palme, J., Hochreiter, S. & Bodenhofer, U. KeBABS: an R package for kernel-based analysis  
461 of biological sequences. *Bioinformatics* **31**, 2574-2576,  
462 doi:10.1093/bioinformatics/btv176 (2015).
- 463 23 Huang, H., Wang, C., Rubelt, F., Scriba, T. J. & Davis, M. M. Analyzing the Mycobacterium  
464 tuberculosis immune response by T-cell receptor clustering with GLIPH2 and genome-  
465 wide antigen screening. *Nat Biotechnol*, doi:10.1038/s41587-020-0505-4 (2020).
- 466 24 Miho, E., Roskar, R., Greiff, V. & Reddy, S. T. Large-scale network analysis reveals the  
467 sequence space architecture of antibody repertoires. *Nat Commun* **10**, 1321,  
468 doi:10.1038/s41467-019-09278-8 (2019).
- 469 25 Greiff, V. *et al.* Learning the High-Dimensional Immunogenomic Features That Predict  
470 Public and Private Antibody Repertoires. *J Immunol* **199**, 2985-2997,  
471 doi:10.4049/jimmunol.1700594 (2017).
- 472 26 Hou, X. *et al.* Shorter TCR beta-Chains Are Highly Enriched During Thymic Selection and  
473 Antigen-Driven Selection. *Front Immunol* **10**, 299, doi:10.3389/fimmu.2019.00299 (2019).
- 474 27 Bagaev, D. V. *et al.* VDJdb in 2019: database extension, new analysis infrastructure and a  
475 T-cell receptor motif compendium. *Nucleic Acids Res* **48**, D1057-D1062,  
476 doi:10.1093/nar/gkz874 (2020).
- 477 28 Jaafoura, S. *et al.* Progressive contraction of the latent HIV reservoir around a core of less-  
478 differentiated CD4(+) memory T Cells. *Nat Commun* **5**, 5407, doi:10.1038/ncomms6407  
479 (2014).
- 480 29 Ahmed, R. *et al.* Human Stem Cell-like Memory T Cells Are Maintained in a State of  
481 Dynamic Flux. *Cell Rep* **17**, 2811-2818, doi:10.1016/j.celrep.2016.11.037 (2016).
- 482 30 Gattinoni, L. *et al.* A human memory T cell subset with stem cell-like properties. *Nat Med*  
483 **17**, 1290-1297, doi:10.1038/nm.2446 (2011).
- 484 31 Chang, J. T. *et al.* Asymmetric T lymphocyte division in the initiation of adaptive immune  
485 responses. *Science (New York, N.Y.)* **315**, 1687-1691, doi:10.1126/science.1139393 (2007).
- 486 32 Borsa, M. *et al.* Modulation of asymmetric cell division as a mechanism to boost CD8(+) T  
487 cell memory. *Science immunology* **4**, doi:10.1126/sciimmunol.aav1730 (2019).
- 488 33 Hou, X. *et al.* Preselection TCR repertoire predicts CD4(+) and CD8(+) T-cell differentiation  
489 state. *Immunology*, doi:10.1111/imm.13256 (2020).
- 490 34 Qazi, K. R. *et al.* Extremely Preterm Infants Have Significant Alterations in Their  
491 Conventional T Cell Compartment during the First Weeks of Life. *J Immunol* **204**, 68-77,

- 492 doi:10.4049/jimmunol.1900941 (2020).
- 493 35 Madi, A. *et al.* T-cell receptor repertoires share a restricted set of public and abundant  
494 CDR3 sequences that are associated with self-related immunity. *Genome research* **24**,  
495 1603-1612, doi:10.1101/gr.170753.113 (2014).
- 496 36 Gossel, G., Hogan, T., Cownden, D., Seddon, B. & Yates, A. J. Memory CD4 T cell subsets  
497 are kinetically heterogeneous and replenished from naive T cells at high levels. *Elife* **6**,  
498 doi:10.7554/eLife.23013 (2017).
- 499 37 Khosravi-Maharlooei, M. *et al.* Crossreactive public TCR sequences undergo positive  
500 selection in the human thymic repertoire. *J Clin Invest* **129**, 2446-2462,  
501 doi:10.1172/JCI124358 (2019).
- 502 38 Golding, A., Darko, S., Wylie, W. H., Douek, D. C. & Shevach, E. M. Deep sequencing of the  
503 TCR-beta repertoire of human forkhead box protein 3 (FoxP3)(+) and FoxP3(-) T cells  
504 suggests that they are completely distinct and non-overlapping. *Clin Exp Immunol* **188**,  
505 12-21, doi:10.1111/cei.12904 (2017).
- 506 39 Kraj, P. & Ignatowicz, L. The mechanisms shaping the repertoire of CD4(+) Foxp3(+)  
507 regulatory T cells. *Immunology* **153**, 290-296, doi:10.1111/imm.12859 (2018).

508
